# Supplementary material
Source: PubMed Central journal article supplement (PMC5210703)
Supplement: supp_pp.16.00095_PP2016-00095R2_Supplemental_Material_1figs.pdf [file supp_pp.16.00095_PP2016-00095R2_Supplemental_Material_1figs.pdf]

---

1 **Supplemental materials**

2 **Supplemental Figures**

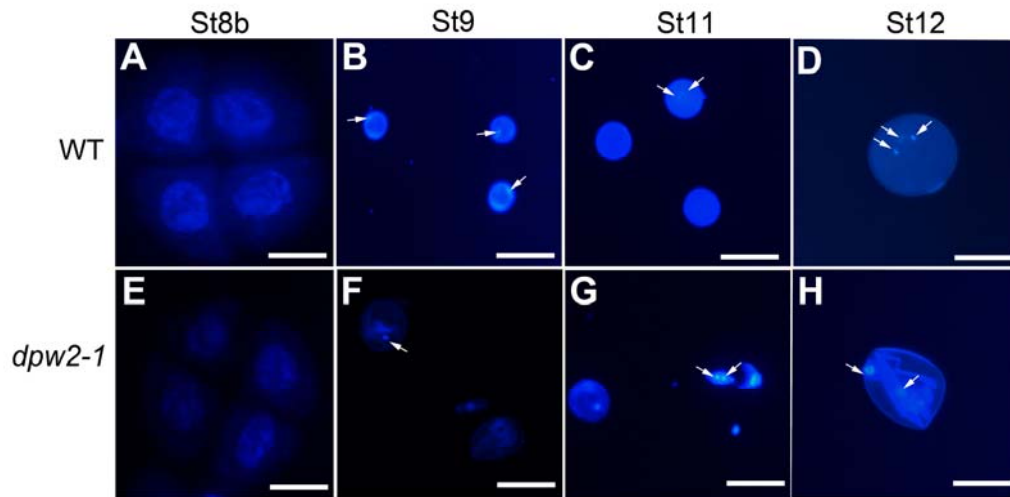

3  
4 **Supplemental Figure 1.** DAPI staining of *dpw2-1* microspores.

5 (A) to (D) wild-type microspores.

6 (E) to (H) *dpw2-1* mutant mrospores.

7 Arrows indicate the nucleus. There is one nucleus at stage 9 (B), two nuclei at  
8 stage 11 (C), and three nuclei at stage 12 (D) in the wild-type. In contrast,  
9 *dpw2-1* does not form microspores with three obvious nuclei (H). Bars = 10  
10  $\mu\text{m}$ .

11

12

13

14

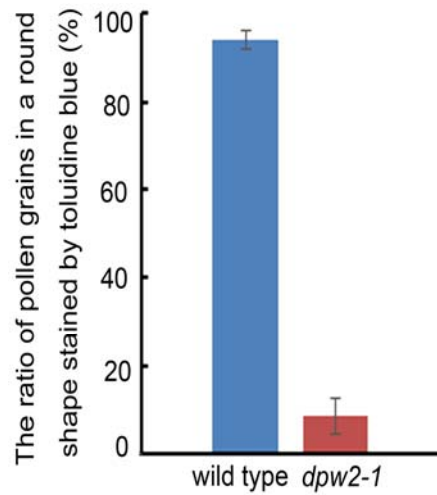

15

16 **Supplemental Figure 2.** The ratio of pollen grains in a normal round shape in  
17 the semi-thin section of WT and *dpw2-1* mutant at heading stage.

18 Error bars indicate SD of the ratio of stained pollen grains from five  
19 independent sections.

20

21

22

23

24

25

26

27

28

29

30

31

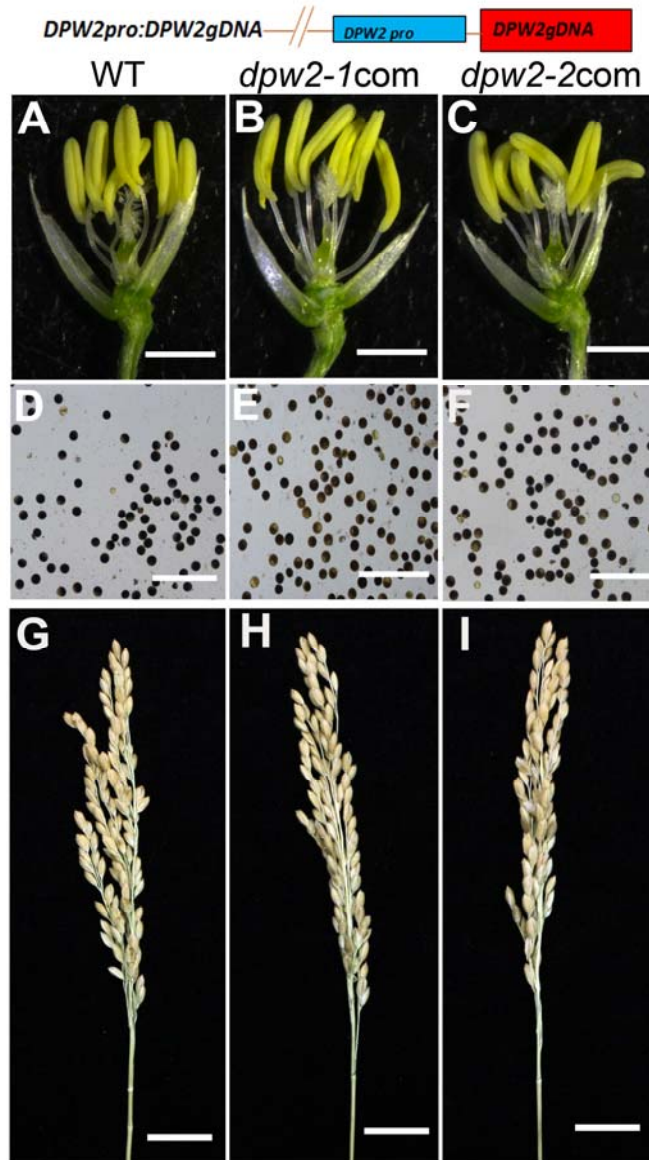

32

33 **Supplemental Figure 3.** Complementation of *dpw2-1* and *dpw2-2* mutants by  
 34 *DPW2* genomic DNA.

35 (A) to (C) stage-12 flower from WT (A), *dpw2-1* complemented with the  
 36 ~4.34-kb wild-type genomic fragment (B), and *dpw2-2* complemented with the  
 37 ~4.34-kb wild-type genomic fragment (C).

38 (D) to (F) Pollens stained with 2 % I<sub>2</sub>-KI solution at stage 12 from WT (D),  
 39 *DPW2*-complemented mutant *dpw2-1com* (E), and *DPW2*-complemented  
 40 mutant *dpw-2com* (F) showing mature pollen grains. GDNA, genomic DNA.

41 (G) to (I) Mature panicle from WT (G), *dpw2-1* complemented with the

---

42 ~4.34-kb wild-type genomic fragment (H), and *dpw2-2* complemented with the  
43 ~4.34-kb wild-type genomic fragment (I).

44 Bars=1mm in (A) to (C); 200  $\mu$ m in (D) to (F); 2 cm in (G) to (I).

45

46

47

```

                *      20      *      40      *      60      *
XP002298644 Pt. : -----MEYSNGN---VFQLVVRQGGFTLVPEAEEKKG-----LYFLSNLQCNIAVIVRT : 47
XP003553956 Gm. : -----MEMANEN---GFQLSVKLSPEFTLVPEAEEKKG-----LYFLSNLQCNIAVIVRT : 47
ATASFT/HHT At. : --MVAENNRNKDVTLSASMDNNNNIKGTNIHLEHQQKFAALVKESESRKQ-----LYFLSNLQCNIAVIVRT : 67
CAT00082 Ca. : -----MENGKSN---TFELTVKQGGFTLVPEAEEKKG-----LYFLSNLQCNIAVIVRT : 47
XP003634222 Vv. : -----MAKASNG---VFELSVRQGGFTLVPEAEEKKG-----LYFLSNLQCNIAVIVRT : 48
AIDCF At. : -----MAD---SFEILVTRKPEVLYVSEASEPKG-----LHFLSNLQCNIAVIVKT : 43
AIFACT At. : -----MVA---SSEFIITRKNDELIPVSETPNG-----HYFLSNLQCNIAVIVKT : 43
XP002449535 Sb. : ---MKQENGGAAVAAA-GEKQQCCQAPPQLVMSVRRGEATLVPEAEEPRGG-----CYLLSNLQCNIAVIVQT : 65
DPW2 Os. : -----MVLGKRGVFTLVPEAEEKKG-----LYFLSNLQCNIAVIVQT : 39
XP002443835 sb. : -----MNNTRRGIHFCF-----QTYVC----- : 19
LOC100273135 Zm. : -----MSVFEMRIKQGGFTLVPEAEEPKG-----LYFLSNLQCNIAVIVQT : 43
XP002993631 Sm. : -----MPVDFK---VELVKEPELVVMEQFVEEQH-----YFLSNLQCNIAVIVMKT : 42
XP001779848 Pp. : -----MKBERGLERLVKADRSNAVPE-----KVVELSSLVVPRVHVQ : 39
HCT Pr. : -----MLITVKNKQVRAAPVQRD-----LWN---SNVLVVPREHTA : 37
AAX83048 Fs. : -----MEKTD---LHNLIEKMYGSLPPPKTT-----LQLSSIDLPGVGRGSIF : 43

```

```

                *      80      *      100      *      120      *      140      *
XP002298644 Pt. : LYCKKSE-----EKGNENAGENVKNAIKRVLVYYPVLAGRLTI---SSE-AKLIHINCT-----GEGAVVVEA : 105
XP003553956 Gm. : VYCKKTA-----ERGNEKAGENVKNAIKRVLVYYPVLAGRLTI---SSE-GKLIHVDCT-----GEGAVVVEA : 105
ATASFT/HHT At. : LYCKKSE-----ERGNEEAVQVIRKALSKVLVYYPVLAGRLTI---SPE-GKLIHVDCT-----GEGAVVVEA : 125
CAT00082 Ca. : LYCKKSG-----EKGNEEAVQVIRKALSKVLVYYPVLAGRLTI---SPE-GKLIHVDCT-----GEGAVVVEA : 105
XP003634222 Vv. : LYCKKSE-----ARGNERAAEIKRDAISKVLVYYPVLAGRLTI---SSE-GKLIHVDCT-----GEGAVVVEA : 106
AIDCF At. : FYVYKSN-----SRNNEESYENVIRKSLSEVLVYYPVLAGRLTI---SPE-GKLIHVDCT-----GEGAVVVEA : 101
AIFACT At. : LYVYKSE-----SRTNQESYENVIRKSLSEVLVYYPVLAGRLTI---SPE-GKLIHVDCT-----GEGAVVVEA : 101
XP002449535 Sb. : VYCKKPP---PSPSSGNGDDDDVVGLRDAIARVLYYHPLAGRLGI---SPE-MKLIHVELT-----GEGAVVVEA : 129
DPW2 Os. : VYCKAAAAG---GGGGG-GAGDPLRESLSRVLVYYPVLAGRLAL---TDD-GKLIHVDCT-----GEGAVVVEA : 99
XP002443835 sb. : ---PRAADD---GGAGRSACDVLRESLAKVLYYYPVLAGRLAN---SDD-GKLIHVDCT-----GEGAVVVEA : 77
LOC100273135 Zm. : VYCKRAADG---GAGGVSACDVLRESLAKVLYYYPVLAGRLAT---SGD-GKLIHVDCT-----GEGAVVVEA : 104
XP002993631 Sm. : IYLYEISS---ARAADNPADVIRQCLSRVLDYYPVLAGRLGI---SSE-GKLIHVDCT-----GEGAVVVEA : 108
XP001779848 Pp. : VIYAYKAS---KGVSYFD---HVVQLGALCRVLTBYRWAGRLMI---DET-CRPIALN-----DGGVVEA : 99
HCT Pr. : SVVYR---PTGSPD---FFSMNLEDAISRLVLYYYPVLAGRLKR---DPE-CRPIALN-----GEGAVVVEA : 96
AAX83048 Fs. : NALLIYNASP---SPTMTSADPAKILIEPAKILVYYPVLAGRLRETN---GDIHVDCA-----GEGAVVVEA : 106

```

```

                *      160      *      180      *      200      *      220
XP002298644 Pt. : EANGAEENG-----DITKED---PDTLGRVMDVPG---ARNILEMPELVAQVTRFCGGFRLGICMNHOMFDG : 169
XP003553956 Gm. : EANGAEENG-----DITKED---PDTLGRVMDVPG---ARNILEMPELVAQVTRFCGGFRLGICMNHOMFDG : 169
ATASFT/HHT At. : EANGAEENG-----DITKED---PDTLGRVMDVVD---ARNILEMPELVAQVTRFCGGFRLGICMNHOMFDG : 189
CAT00082 Ca. : EANGAEENG-----DITKED---PDTLGRVMDVPG---ARNILEMPELVAQVTRFCGGFRLGICMNHOMFDG : 169
XP003634222 Vv. : EANGAEENG-----DITKED---PDTLGRVMDVPG---ARNILEMPELVAQVTRFCGGFRLGICMNHOMFDG : 170
AIDCF At. : EANGAEENG-----DITKED---PDTLGRVMDVPG---ARNILEMPELVAQVTRFCGGFRLGICMNHOMFDG : 167
AIFACT At. : EANGAEENG-----DITKED---PDTLGRVMDVPG---ARNILEMPELVAQVTRFCGGFRLGICMNHOMFDG : 166
XP002449535 Sb. : EANGAEENG-----DITKED---PDTLGRVMDVPG---ARNILEMPELVAQVTRFCGGFRLGICMNHOMFDG : 193
DPW2 Os. : EANGAEENG-----DITKED---PDTLGRVMDVPG---ARNILEMPELVAQVTRFCGGFRLGICMNHOMFDG : 163
XP002443835 sb. : EANGAEENG-----DITKED---PDTLGRVMDVPG---ARNILEMPELVAQVTRFCGGFRLGICMNHOMFDG : 141
LOC100273135 Zm. : EANGAEENG-----DITKED---PDTLGRVMDVPG---ARNILEMPELVAQVTRFCGGFRLGICMNHOMFDG : 168
XP002993631 Sm. : EANGAEENG-----DITKED---PDTLGRVMDVPG---ARNILEMPELVAQVTRFCGGFRLGICMNHOMFDG : 172
XP001779848 Pp. : EANGAEENG-----DITKED---PDTLGRVMDVPG---ARNILEMPELVAQVTRFCGGFRLGICMNHOMFDG : 158
HCT Pr. : EANGAEENG-----DITKED---PDTLGRVMDVPG---ARNILEMPELVAQVTRFCGGFRLGICMNHOMFDG : 158
AAX83048 Fs. : EANGAEENG-----DITKED---PDTLGRVMDVPG---ARNILEMPELVAQVTRFCGGFRLGICMNHOMFDG : 169

```

```

                *      240      *      260      *      280      *      300
XP002298644 Pt. : IGAMEFVNSWGTARG---LPIKVPFF-----IDRSILKARNPKKIDPEEHEFAEIRKKS---STNDL----- : 226
XP003553956 Gm. : IGAMEFVNSWGTARG---LPIKVPFF-----IDRSILKARNPKKIDPEEHEFAEIRKKS---STNDL----- : 226
ATASFT/HHT At. : IGAMEFVNSWGTARG---LPIKVPFF-----IDRSILKARNPKKIDPEEHEFAEIRKKS---STNDL----- : 246
CAT00082 Ca. : IGAMEFVNSWGTARG---LPIKVPFF-----IDRSILKARNPKKIDPEEHEFAEIRKKS---STNDL----- : 226
XP003634222 Vv. : IGAMEFVNSWGTARG---LPIKVPFF-----IDRSILKARNPKKIDPEEHEFAEIRKKS---STNDL----- : 227
AIDCF At. : IGAMEFVNSWGTARG---LPIKVPFF-----IDRSILKARNPKKIDPEEHEFAEIRKKS---STNDL----- : 224
AIFACT At. : IGAMEFVNSWGTARG---LPIKVPFF-----IDRSILKARNPKKIDPEEHEFAEIRKKS---STNDL----- : 223
XP002449535 Sb. : IGAMEFVNSWGTARG---LPIKVPFF-----IDRSILKARNPKKIDPEEHEFAEIRKKS---STNDL----- : 211
DPW2 Os. : IGAMEFVNSWGTARG---LPIKVPFF-----IDRSILKARNPKKIDPEEHEFAEIRKKS---STNDL----- : 223
XP002443835 sb. : IGAMEFVNSWGTARG---LPIKVPFF-----IDRSILKARNPKKIDPEEHEFAEIRKKS---STNDL----- : 201
LOC100273135 Zm. : IGAMEFVNSWGTARG---LPIKVPFF-----IDRSILKARNPKKIDPEEHEFAEIRKKS---STNDL----- : 226
XP002993631 Sm. : IGAMEFVNSWGTARG---LPIKVPFF-----IDRSILKARNPKKIDPEEHEFAEIRKKS---STNDL----- : 233
XP001779848 Pp. : IGAMEFVNSWGTARG---LPIKVPFF-----IDRSILKARNPKKIDPEEHEFAEIRKKS---STNDL----- : 214
HCT Pr. : IGAMEFVNSWGTARG---LPIKVPFF-----IDRSILKARNPKKIDPEEHEFAEIRKKS---STNDL----- : 215
AAX83048 Fs. : IGAMEFVNSWGTARG---LPIKVPFF-----IDRSILKARNPKKIDPEEHEFAEIRKKS---STNDL----- : 220

```



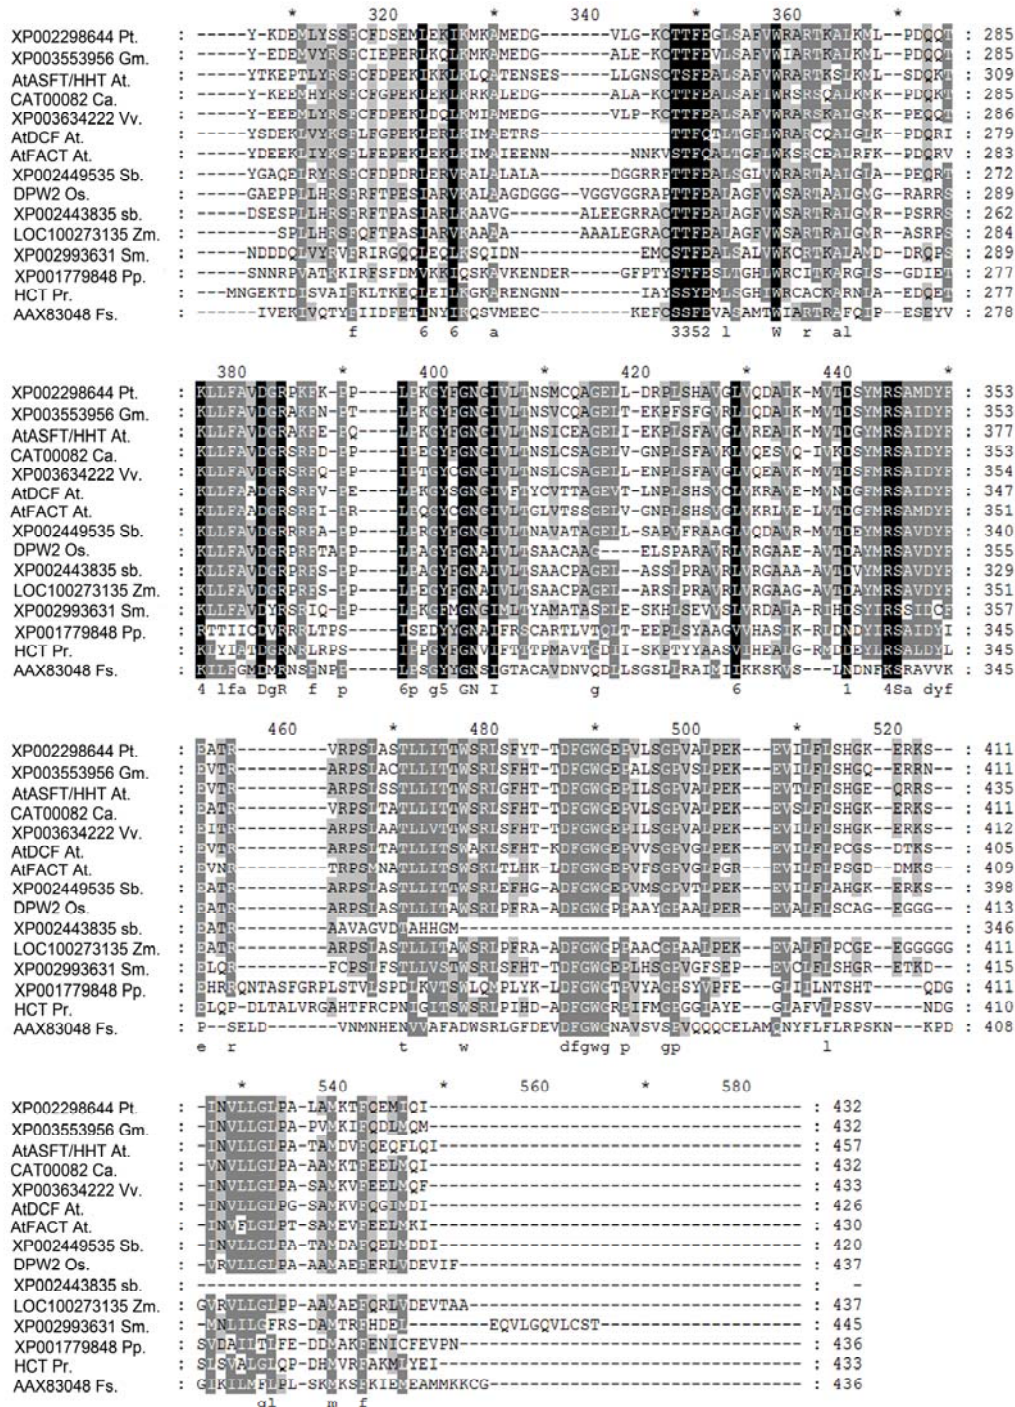

49

50 **Supplemental Figure 4.** Sequence alignment of DPW2 and 14 DPW2-related  
51 proteins.

52 The alignment was used to produce the NJ phylogenetic tree shown in Figure  
53 4.
