# Supplementary material
Source: PubMed Central journal article supplement (PMC5210703)
Supplement: supp_pp.16.00095_PP2016-00095R2_Supplemental_Material_2tbls.pdf [file supp_pp.16.00095_PP2016-00095R2_Supplemental_Material_2tbls.pdf]

---

1 **Supplemental Tables**

2 **Supplemental Table 1.** Allelic test of *dpw2-1* and *dpw2-2*.

3 Segregation of F1 plants (sterile : fertile)

|                           | ♂ \ ♀ | <i>dpw2-1</i> | <i>dpw2-2</i> |
|---------------------------|-------|---------------|---------------|
| heterzygous <i>dpw2-1</i> |       |               | <b>12:10</b>  |
| heterzygous <i>dpw2-2</i> |       | <b>11:10</b>  |               |

4

5

6

7

8

9

10

11

12

13

14

15

16

17

18

19 **Supplemental Table 2.** *In vitro* substrate specificities of recombinant DPW2  
20 protein with different acyl acceptors.

21 Relative activities are presented as peak areas (mAU) or in percentage activity

22 with feruloyl-CoA and 16-hydroxy-hexadecanoic acid. n.d., Not detected

| Acyl acceptor                  | peak area [mAU] | Activity(%) |
|--------------------------------|-----------------|-------------|
| 15-hydroxy-pentadecanoic acid  | 15.63           | 79          |
| 16-hydroxy-hexadecanoic acid   | 19.7            | 100         |
| 17-hydroxy-heptadecanoic acid  | 10.92           | 55          |
| 20-hydroxy-eicosanoic acid     | 1.38            | 7           |
| 22-hydroxy-docosanoic acid     | n.d.            |             |
| 12-hydroxy-octadecanoic acid   | n.d.            |             |
| methanol                       | 1               |             |
| ethanol                        | n.d.            |             |
| 1-propanol                     | n.d.            |             |
| 2-propanol                     | n.d.            |             |
| 1-butanol                      | n.d.            |             |
| 1-hexanol                      | n.d.            |             |
| 1-octanol                      | n.d.            |             |
| 1-dodecanol                    | n.d.            |             |
| 1-tetradecanol                 | n.d.            |             |
| 1-hexadecanol                  | n.d.            |             |
| 1-octadecanol                  | n.d.            |             |
| 2-hexenol                      | n.d.            |             |
| dodecanedioic acid             | n.d.            |             |
| hexadecanedioic acid           | n.d.            |             |
| hexadecanoic acid methyl ester | n.d.            |             |
| hexadecane                     | n.d.            |             |
| lignoceric acid                | n.d.            |             |
| coniferyl alcohol              | n.d.            |             |
| sinapyl alcohol                | n.d.            |             |
| shikimic acid                  | n.d.            |             |
| tyramine                       | n.d.            |             |
| tryptamine                     | n.d.            |             |

23

24

25

26

27

28

29

---

30 **Supplemental Table 3.** List of the primers used for *DPW2* mapping.

| <b>Markers</b>  | <b>Forward primers</b>         | <b>Reverse primers</b>        | <b>Locus</b> |
|-----------------|--------------------------------|-------------------------------|--------------|
| <b>OS116</b>    | 5'GAGAAGCCAGCAATG<br>TTATGA3'  | 5'TACCAAACCGTTTT<br>GAGTAGG3' | AP003418     |
| <b>OS117</b>    | 5'TTATGAGACTATGGCT<br>TGTCGG3' | 5'CCTTCCAATCACC<br>ACTTCCT3'  | AP003412     |
| <b>QXL117-1</b> | 5'GTTCTCTCTCCCCTTT<br>CCTC3'   | 5'TAATTCCTCTGCTC<br>CTCTCG3'  | AP004223     |
| <b>LXCC15</b>   | 5'CGAAGTCACAGTTTTC<br>AAAC3'   | 5'TGCTGTTGGAACCT<br>TGTGG3'   | AP004223     |

31

32

33

34

35

36

37

38

39

40

41 **Supplemental Table 4.** Primers used for *DPW2* vector construction.

| <b>Primer names</b>     | <b>Sequence (restriction enzyme sites underlined)</b>            | <b>Constructs</b>                |
|-------------------------|------------------------------------------------------------------|----------------------------------|
| <b>70025gDNAF</b>       | CCATGATTAC <u>GAATT</u><br><u>C</u> TATTGCCTGTTTGT<br>GGCTGGAC   | DPW2 <sub>pro</sub> :DPW2gDNA    |
| <b>70025gDNAR</b>       | ATTCGAGCTGGTCA<br><u>CCGCCGCTTACACG</u><br>TACTGTATTGG           | DPW2 <sub>pro</sub> :DPW2gDNA    |
| <b>70025Promoter-F</b>  | CCATGATTAC <u>GAATT</u><br><u>C</u> AAAAGGCAAAGA<br>AAAGGATGCG   | DPW2 <sub>pro</sub> :GUS         |
| <b>70025Promoter-R</b>  | CTCAGATCTAC <u>CATG</u><br><u>G</u> TGTTGGATTGATCG<br>ATCGGATCAG | DPW2 <sub>pro</sub> :GUS         |
| <b>70025Promoter-F1</b> | CCATGATTAC <u>GAATT</u><br><u>C</u> TTCAGCGGACCAC<br>ATGTGATGGTC | DPW2 <sub>pro</sub> :DPW2CDS-GFP |
| <b>70025Promoter-R1</b> | ATTTACCCTC <u>AGATC</u><br><u>I</u> TGTTGGATTGATCG<br>ATCGGATCAG | DPW2 <sub>pro</sub> :DPW2CDS-GFP |
| <b>70025pA7-F</b>       | GCTCTAGACATGGG<br>GCAAGAAGCCGCCG<br>CCGCC                        | pA7-DPW2CDS-GFP                  |
| <b>70025pA7-R</b>       | CGGGATCCTCAGAA<br>GATCACCTCGTCCA<br>CGAG                         | pA7-DPW2CDS-GFP                  |
| <b>70025CDS-GFP-F</b>   | GAAGATCTGATGGG<br>GCAAGAAGCCGCCG<br>CCGCC                        | 35S <sub>pro</sub> :DPW2CDS-GFP  |
| <b>70025CDS-GFP-R</b>   | GGACTAGTGAAGAT<br>CACCTCGTCCACGA<br>GTCG                         | 35S <sub>pro</sub> :DPW2CDS-GFP  |
| <b>70025ORF-F</b>       | CGGGATCCATGGGG<br>CAAGAAGCCGCCGC<br>CGCC                         | pET28a-DPW2CDS                   |
| <b>70025ORF-R</b>       | CGGAATTCTCAGAA<br>GATCACCTCGTCCA<br>CGAG                         | pET28a-DPW2CDS                   |

42

43

44
